# Supplementary material
Source: MDPI journal article supplement (https://www.mdpi.com/2071-1050/13/10/5632)
Supplement: s1 [file s1]

**Supplementary Table S1.** Characteristics between participants who lived in car-dependent areas and somewhat walkable/very walkable areas ( $n = 2867$ ).

| Characteristics            |                                    | Car-Dependent<br>$n = 1043$ | Somewhat<br>Walkable/very<br>Walkable<br>$n = 1824$ | $p$ -Value <sup>a</sup> |
|----------------------------|------------------------------------|-----------------------------|-----------------------------------------------------|-------------------------|
| Sex                        | Men                                | 51.7                        | 50.0                                                | 0.387                   |
| Age groups                 | 65-74 year                         | 66.3                        | 63.4                                                | 0.112                   |
|                            | 75-79 year                         | 19.4                        | 22.7                                                |                         |
|                            | ≥ 80 year                          | 14.3                        | 13.9                                                |                         |
| Education status           | High school or lower               | 69.4                        | 56.1                                                | <0.001                  |
|                            | Two-year college or career college | 11.9                        | 15.5                                                |                         |
|                            | University or higher               | 18.7                        | 28.3                                                |                         |
| Marital status             | Yes                                | 79.5                        | 81.4                                                | 0.207                   |
| Resident status            | Living alone                       | 10.0                        | 10.7                                                | 0.544                   |
| Employment status          | Yes                                | 35.4                        | 24.8                                                | <0.001                  |
| Subjective economic status | Poor                               | 26.5                        | 23.7                                                | 0.097                   |

Abbreviations

Walk Score®: Car-dependent = 0-49, Somewhat walkable/very walkable = 50-89

<sup>a</sup>chi-square test
