# Supplementary material
Source: MDPI journal article supplement (https://www.mdpi.com/2071-1050/13/10/5632)

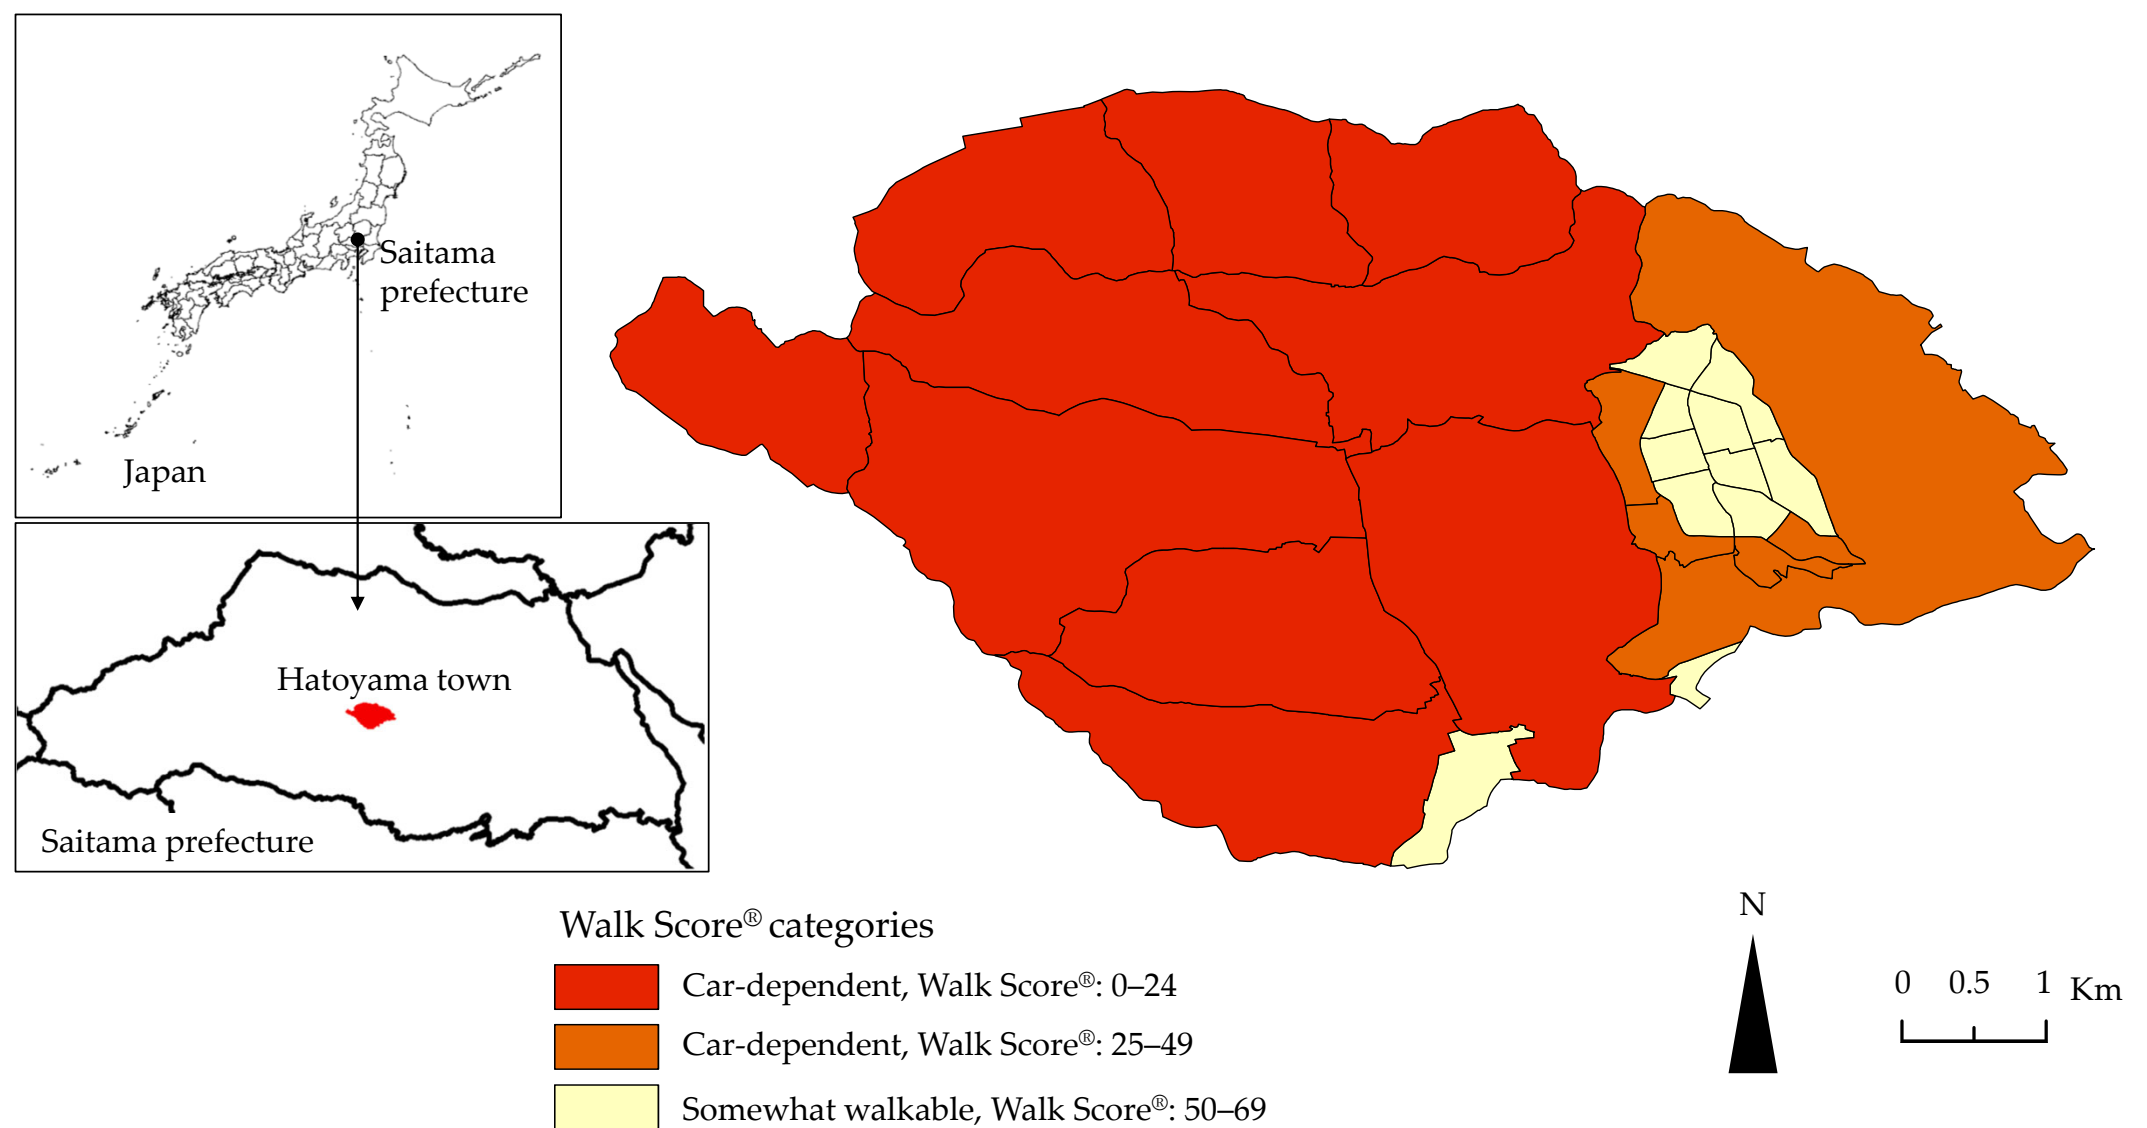

Supplementary Figure S1. Walk Score® categories in the study area

Supplement: s1 [file s1]
